# Supplementary material
Source: PubMed Central journal article supplement (PMC4750723)
Supplement: ipri-33-191S1.pdf [file ipri-33-191S1.pdf]

*Supplementary material for Guassora AD. Deciding if lifestyle is a problem: GP risk assessments or patient evaluations? A conversation analytic study of preventive consultations in general practice. Scand J Prim Health Care 2015;doi: 10.3109/02813432.2015.1078564.*

### Appendix 1: Transcription symbols

|            |                                      |
|------------|--------------------------------------|
| [          | The beginning of overlapping speech  |
| ]          | The end of overlapping speech        |
| (.)        | A pause of less than 0.2 seconds     |
| (.5)       | A pause measured in seconds          |
| =          | Uttered with no pause at all         |
| :          | Prolonged sound                      |
| word       | Emphatic                             |
| WORD       | Increased volume                     |
| °word°     | Soft spoken                          |
| <word>     | Slow speech                          |
| >word<     | Fast speech                          |
| .h         | In-breath                            |
| wo(h)rd    | Laughing voice                       |
| heh heh    | laughter                             |
| wor-       | A cut-off, i.e. a sudden speech stop |
| XX         | Unintelligible                       |
| ↑word      | Rising intonation                    |
| ↓word      | Falling intonation                   |
| turn-unit. | Falling prosody                      |
| turn-unit? | Rising prosody                       |
| turn-unitç | Mid rising prosody                   |

### Appendix 2: Transcripts with CA symbols

(Excerpt 1) (C2)

01. DOCTOR (DO): and you don't smoke do you, [as far as I recall.
02. PATIENT (PA): [no I've never smoked a cigarette.

(Excerpt 2) (B2)

01. DO: what about erhm, tobaccoç
02. (.)
03. DO: do you smoke,
04. (.4)
05. PA: no I never have.
06. DO: no.
07. PA: have tried it though.

(Excerpt 3) (B1)

01. DO: and tobacco, you don't smoke,
02. PA: no.
03. DO: excellent and your weight what does it say,
04. PA: well it's sort of on the rise.
05. DO: hmm how much do you weigh nowç

(Excerpt 4) (A2)

01. DO: then I just need to check on smoking
02. how are things going with that?

03. PA: well it's going a lot better but I ha[ven't quit entirely yet.

04. DO: [yes.

05. DO: no: (.) what- how many do you smoke a day,

(Excerpt 5)(A1)

01. DO: then, erhm, we usually also talk about exercise what- what-
02. PA: walk and bicycle a lot.
03. DO: yes.
04. PA: but I don't visit the gym or anything like that.
05. DO: no, no.
06. PA: but I consider myself very active.
07. DO: but that's also – the main thing is that you move your body and bicycling will also get your heart rate up and
08. PA: yes.
09. DO: are you active on a daily basisç

(Excerpt 6) (B3)

01. DO: how about your weight, is it somewhat stable,
02. PA: actually I'm in the process of losing weight.
03. DO: EXcellent.
04. PA: excellent
05. DO: that's really ↑great,
06. (.)
07. PA:so: I've lost four ki:los.
08. (.)
09. DO: during how long,
10. PA: hh.hh. (.6) ↑six months [ I think
11. DO: [six months? well > that's ↑marvelous <
12. PA: so er:h-
13. (.)
14. DO: that's something you can sense yourself [right
15. PA: [yeah:
16. DO: that [it's = it's really good right
17. PA: [sure yes.
18. (.)
19. PA: I can sense it [both on my clothing
20. DO: [ > also when you consider < hips and these things.
21. PA: yes.
22. DO: you know it's really good for
23. PA: sure it is.
24. DO: joints and >°all these things° <

(Excerpt 7) (C4)

01. DO: what, what d- what other kinds of exercise do you do,

02. PA: naturally we bicycle.  
 03. DO: °yes°  
 04. PA: but I must con- I must confess that we  
 (1.3) probably haven't kept it up (.) this  
 XX summer.  
 05. DO: °oh.°  
 06. PA: among others because of the weather.  
 07. (.6)  
 08. PA: it has been windy as he(h)ll. heh heh  
 09. DO: ye::[s  
 10. PA: [but of course now we are about to go  
 for walks.  
 11. (.4)  
 12. DO: [XX  
 13. PA: [then it will be better = we walk in the  
 wintertime.  
 14. DO: yes.  
 15. PA: bicycle in the [°summer.°  
 16. DO: [every day or what,  
 17. PA: h (.) two = three times a week.  
 18. DO: yes for how long,  
 19. (.)  
 20. PA: about an hour.  
 21. DO: °↓yes:°  
 22. (.7)  
 23. PA: approximately five kilometres.  
 24. DO: what prevents you from doing this ↑every  
 day.  
 25. PA: nothing does.  
 26. (.)  
 27. DO: °no°  
 28. PA: nothing.  
 29. DO: couldn't you do this every d[ay  
 30. PA: [we  
 could easily do that.

### Appendix 3: Original Danish data

(Excerpt 1) (C2)

01. DOCTOR (DO): Og du ryger jo ikke vel, [Så  
 vidt jeg husker.  
 02. PATIENT (PA): [Nej  
 03. jeg har aldrig røget  
 en cigaret.

(Excerpt 2) (B2)

01. DO: Hvad hvordan er det ellers med ø:  
 tobak?  
 02. (.)  
 03. DO: Ryger du,  
 04. (.4)  
 05. PA: Nej, det har jeg aldrig gjort.  
 06. DO: Nej.  
 07. PA: Jo jeg har prøvet.

(Excerpt 3) (B1)

01. DO: godt .h så:- øh tobak du ryger ikke,

02. PA: nej.  
 03. DO: su:per god tog vægt hvad siger den,  
 04. PA: ja:den er sådan lidt på vej op.  
 05. DO: hmm hvad- hvor meget vejer du?

(Excerpt 4)(A2)

01. DO: så skal jeg lige høre med hensyn til  
 rygning hvordan det går med det?  
 03. PA: ej det går meget bedre men jeg er ik[ke  
 helt stoppet.  
 04. DO: [ja.  
 05. DO: ne:j (.) hva- hvor meget er du oppe på om  
 dagen,

(Excerpt 5)(A1)

01. DO: så ø::h plejer vi også lige at snakke om  
 med motion hvad-hvad-  
 02. PA: Jeg går meget og cykler meget.  
 03. DO: ja.  
 04. PA: men jeg går ikke til kul- til gymnastik eller  
 sådan  
 05. DO: nej nej.  
 06. PA: men jeg synes jeg bevæger mig ret  
 meget.  
 07. DO: men det er også- det vigtigste er når du  
 får rørt dig og cykler der får du jo også  
 pulsen op og  
 08. PA: ja.  
 09. DO: rører du dig dagligt?

(Excerpt 6) (B3)

01. DO: men hvad med din vægt = ligger den  
 sådan stabi:lt eller,  
 02. PA: altså jeg er begyndt at tabe mig.  
 03. DO: såDA:N.  
 04. PA: s:ådan.  
 05. DO: Hvor er det ↑flot,  
 06. (.)  
 07. PA: Så: jeg har tabt 4 ki:lo  
 08. (.)  
 09. DO: På hvor lang tid,  
 10. PA: .hh.hh. (.6) et ↑halvt år [tror jeg  
 11. DO: [et halvt år, jamen  
 altså > hvor er det fan↑tastisk <  
 12. PA: Så ø:  
 13. (.)  
 14. DO: Det kan du også godt mærke det selv  
 [ikk  
 15. PA: [Ja:  
 16. DO: at [det e:r = er rigtig godt ja  
 17. PA: [Jo ja.  
 18. (.)  
 19. PA: Det kan jeg mærke [både på mit tøj og  
 20. DO: [> Også når man  
 tænker< hofte og sådan noget.  
 21. PA: Ja.

22. DO: Altså, det er jo rigtigt go dt ikk for  
 23. PA: Ja det er jo det også altså.  
 24. DO: led og >°alt sådan noget°<

(Excerpt 7)(C4)

01. DO: hvad = hvad- g- hvad laver du ellers sådan  
 af motion og sådan,  
 02. PA: Vi cykler jo.  
 03. DO: °ja°  
 04. PA: men jeg må er- jeg må erkende at vi har  
 (1.3) vi har nok ikke holdt det så meget  
 ved lige her i (.) den XX sommer.  
 05. DO: °nå°  
 06. PA: blandt andet vel på grund af vejret.  
 07. (.6)  
 08. PA: det har blæst ad he(h)lvede til heh heh  
 09. DO: ja[::  
 10. PA: [så skal vi jo til at gå.  
 11. (.4)  
 12. DO: [XX

13. PA: [så bliver det bedre = vi går om  
 vinteren.  
 14. DO: ja.  
 15. PA: cykler om [°sommeren.°  
 16. DO: [hver dag eller noget,  
 17. PA: .h (.) tr- to = tre gange om ugen.  
 18. DO: ja hvor lang tid,  
 19. (.)  
 20. PA: times tid.  
 21. DO: °↓ja:°  
 22. (.7)  
 23. PA: cirka fem kilometer.  
 24. DO: hvad er det der gør at I ikke gør det ↑hver  
 dag.  
 25. PA: det er ingenting.  
 26. (.)  
 27. DO: °nej°  
 28. PA: ingenting.  
 29. DO: ↑kunne I ikke gøre det hver d[ag  
 30. PA: [det  
 kunne vi godt gøre ja.
